# Supplementary material for: Loss of menin in osteoblast lineage affects osteocyte–osteoclast crosstalk causing osteoporosis
Source: Springer Nature journal article supplement (doi:10.1038/cdd.2016.165), 2017-01-20
Supplement: 41418_2017_BFcdd2016165_MOESM32_ESM.pdf [file 41418_2017_BFcdd2016165_MOESM32_ESM.pdf]

**Table S1. Mendelian ratio.**

| Gender | Genotype         |                    |
|--------|------------------|--------------------|
|        | flox/flox<br>+/+ | flox/flox<br>cre/+ |
| Female | 43 (32%)         | 29 (22%)           |
| Male   | 33 (25%)         | 28 (21%)           |
| Total  | 76 (57%)         | 57 (43%)           |

Mendelian ratio of offspring from  $Men1^{flox}$  ( $Men1^{flox/flox}; +/+$ )  $\times$   $Men1^{Runx2Cre}$  ( $Men1^{flox/flox}; Tg(Runx2-cre)/+$ ). Data are shown as mouse numbers with percentage in parentheses.

**Table S2. Cancellous parameters measured by micro CT.**

| Group | n | Age      | Gender | Bone     |                                 | BV/TV (%)          | Tb.Th. ( $\mu\text{m}$ ) | Tb.N. (per $\mu\text{m}$ ) | Tb.Sp. ( $\mu\text{m}$ ) |
|-------|---|----------|--------|----------|---------------------------------|--------------------|--------------------------|----------------------------|--------------------------|
| 1     | 5 | 12 weeks | Male   | Femur    | <i>MenI</i> <sup>fllox</sup>    | 7.50 $\pm$ 0.64    | 51.73 $\pm$ 9.68         | 0.00185 $\pm$ 0.00055      | 304.2 $\pm$ 80.15        |
|       | 5 |          |        |          | <i>MenI</i> <sup>Runx2Cre</sup> | 3.80 $\pm$ 0.43**  | 52.34 $\pm$ 9.22         | 0.00084 $\pm$ 0.00019      | 377.1 $\pm$ 92.48        |
| 2     | 5 | 12 weeks | Female | Tibia    | <i>MenI</i> <sup>fllox</sup>    | 1.95 $\pm$ 0.25    | 44.94 $\pm$ 2.91         | 0.00044 $\pm$ 0.00006      | 681.1 $\pm$ 35.34        |
|       | 5 |          |        |          | <i>MenI</i> <sup>Runx2Cre</sup> | 0.94 $\pm$ 0.10**  | 39.98 $\pm$ 1.34         | 0.00024 $\pm$ 0.00003*     | 596.4 $\pm$ 75.96        |
| 3     | 6 | 12 weeks | Female | Vertebra | <i>MenI</i> <sup>fllox</sup>    | 14.02 $\pm$ 0.75   | 96.58 $\pm$ 3.09         | 0.00145 $\pm$ 0.00006      | 481.6 $\pm$ 7.89         |
|       | 6 |          |        |          | <i>MenI</i> <sup>Runx2Cre</sup> | 11.92 $\pm$ 0.54*  | 101.7 $\pm$ 2.73         | 0.00118 $\pm$ 0.00005**    | 493.4 $\pm$ 21.20        |
| 4     | 6 | 12 weeks | Female | Femur    | <i>MenI</i> <sup>fllox</sup>    | 3.87 $\pm$ 0.62    | 62.55 $\pm$ 2.42         | 0.00061 $\pm$ 0.00008      | 380.7 $\pm$ 11.39        |
|       | 6 |          |        |          | <i>MenI</i> <sup>OsxCre</sup>   | 0.83 $\pm$ 0.14*** | 54.45 $\pm$ 2.12*        | 0.00015 $\pm$ 0.00002***   | 828.7 $\pm$ 68.07***     |

Parameters are shown as bone volume per tissue volume (BV/TV), trabecular thickness (Tb.Th.), trabecular numbers (Tb.N.), and trabecular separation (Tb.Sp.) (n=3–6; \* p < 0.05, \*\* p < 0.01, \*\*\* p < 0.001). Data are represented as mean  $\pm$  SEM.

**Table S3. Cortical thickness and porosity determined by micro CT.**

| <b>Age</b>  | <b>Gender</b> | <b>Tissue</b> |                                 | <b>Cs.Th. (<math>\mu\text{m}</math>)</b> | <b>Porosity (%)</b> |
|-------------|---------------|---------------|---------------------------------|------------------------------------------|---------------------|
| 12<br>weeks | Female        | Femur         | <i>MenI</i> <sup>fllox</sup>    | 174.9 $\pm$ 8.18                         | 0.21 $\pm$ 0.19     |
|             |               |               | <i>MenI</i> <sup>Runx2Cre</sup> | 164.6 $\pm$ 11.61                        | 0.08 $\pm$ 0.05     |

Parameters are shown as cross-sectional thickness (Cs.Th.) and porosity. (n=4 or 5).

Data are represented as mean  $\pm$  SEM.

**Table S4. Microarray-revealed differentially expressed genes and their expression levels (log<sub>2</sub> scale).**

**Upregulated in *Men1*-deficient primary osteocytes**

| Gene symbol | Expression level (log <sub>2</sub> scale) |                        | Fold change |
|-------------|-------------------------------------------|------------------------|-------------|
|             | Ctrl                                      | <i>Men1</i> -deficient |             |
| F13a1       | 7.35618                                   | 9.695811               | 5.06        |
| Saa3        | 9.465763                                  | 11.42916               | 3.90        |
| Mmp13       | 10.7719                                   | 12.56339               | 3.46        |
| Hpse        | 8.150388                                  | 9.541623               | 2.62        |
| Fcgr2b      | 9.995169                                  | 11.24563               | 2.38        |
| Mcpt8       | 7.323074                                  | 8.41571                | 2.13        |
| Cp          | 9.710932                                  | 10.76933               | 2.08        |
| Apoc2       | 8.689564                                  | 9.585059               | 1.86        |
| Cxcl5       | 8.230485                                  | 9.12476                | 1.86        |
| Lcn2        | 8.23552                                   | 9.036465               | 1.74        |
| Npy         | 8.112924                                  | 8.899504               | 1.72        |
| Wif1        | 8.13022                                   | 8.886517               | 1.69        |
| Apoe        | 8.772759                                  | 9.513904               | 1.67        |
| Cd5l        | 8.948753                                  | 9.671456               | 1.65        |
| Trf         | 9.717886                                  | 10.4178                | 1.62        |
| Lgals3bp    | 10.97108                                  | 11.66893               | 1.62        |
| Tinagl1     | 9.096196                                  | 9.777411               | 1.60        |
| Mmp8        | 9.338769                                  | 9.993589               | 1.57        |
| Hp          | 7.629641                                  | 8.278437               | 1.57        |
| Plbd1       | 7.68419                                   | 8.328152               | 1.56        |
| Acan        | 7.746571                                  | 8.38426                | 1.56        |
| Ccl3        | 9.981727                                  | 10.60944               | 1.55        |
| Ngf         | 9.31053                                   | 9.937298               | 1.54        |
| Siglec1     | 10.1172                                   | 10.74208               | 1.54        |
| Acpp        | 7.415874                                  | 8.037115               | 1.54        |
| Ccl6        | 7.024841                                  | 7.617164               | 1.51        |
| Il4ra       | 11.12462                                  | 11.68265               | 1.47        |
| Mmp12       | 9.385585                                  | 9.935935               | 1.46        |
| Cxcl10      | 7.668655                                  | 8.21177                | 1.46        |
| Pla2g7      | 10.87439                                  | 11.36798               | 1.41        |

**Downregulated in *Men1*-deficient primary osteocytes**

| Gene symbol | Expression level (log2 scale) |                        | Fold change |
|-------------|-------------------------------|------------------------|-------------|
|             | Ctrl                          | <i>Men1</i> -deficient |             |
| Matn2       | 10.25597                      | 9.840894               | 0.75        |
| Postn       | 12.43594                      | 12.01974               | 0.75        |
| Ccdc80      | 9.717469                      | 9.297493               | 0.75        |
| Fam180a     | 9.605881                      | 9.157597               | 0.73        |
| Col18a1     | 9.433644                      | 8.980346               | 0.73        |
| Fam19a1     | 8.077728                      | 7.61897                | 0.73        |
| Lamb2       | 11.61246                      | 11.14792               | 0.72        |
| Igfbp4      | 12.73658                      | 12.26349               | 0.72        |
| Lama1       | 8.851841                      | 8.361239               | 0.71        |
| Fst         | 11.20136                      | 10.67059               | 0.69        |
| Tgfb2       | 10.14087                      | 9.604809               | 0.69        |
| Col6a2      | 11.66239                      | 11.11617               | 0.68        |
| Ltbp3       | 10.5877                       | 10.04005               | 0.68        |
| Ptn         | 11.63688                      | 11.08813               | 0.68        |
| Adamts5     | 12.0442                       | 11.49463               | 0.68        |
| Clec3b      | 8.115891                      | 7.565344               | 0.68        |
| Matn4       | 9.640471                      | 9.084593               | 0.68        |
| Pgf         | 8.150695                      | 7.594744               | 0.68        |
| Hhip        | 7.710243                      | 7.15002                | 0.68        |
| Fbln5       | 11.93608                      | 11.37126               | 0.68        |
| Eda         | 9.347228                      | 8.777605               | 0.67        |
| Bmp5        | 7.846486                      | 7.275277               | 0.67        |
| Arsi        | 9.261346                      | 8.687857               | 0.67        |
| Timp3       | 12.63602                      | 12.05095               | 0.67        |
| Vit         | 8.152734                      | 7.562057               | 0.66        |
| Nov         | 12.20697                      | 11.61445               | 0.66        |
| Svep1       | 12.08025                      | 11.48415               | 0.66        |
| Omd         | 10.42361                      | 9.821304               | 0.66        |
| Lgi2        | 8.502823                      | 7.867727               | 0.64        |
| Ucma        | 9.251044                      | 8.610236               | 0.64        |
| Slit3       | 11.92557                      | 11.28276               | 0.64        |
| Wisp2       | 12.93158                      | 12.28748               | 0.64        |
| Podn        | 11.33899                      | 10.69049               | 0.64        |
| Pdgfrl      | 10.16468                      | 9.51122                | 0.64        |
| Igfbp5      | 11.5805                       | 10.92281               | 0.63        |
| Col11a1     | 10.43427                      | 9.773326               | 0.63        |
| Adamts12    | 9.641748                      | 8.979573               | 0.63        |
| Nid2        | 11.1511                       | 10.48538               | 0.63        |

| Gene symbol | Expression level (log2 scale) |                        | Fold change |
|-------------|-------------------------------|------------------------|-------------|
|             | Ctrl                          | <i>Men1</i> -deficient |             |
| Thsd4       | 9.364558                      | 8.695619               | 0.63        |
| Mdk         | 8.691753                      | 7.993898               | 0.62        |
| Htra3       | 9.149244                      | 8.436374               | 0.61        |
| Ecm2        | 7.495006                      | 6.777874               | 0.61        |
| Bmp6        | 8.430196                      | 7.700482               | 0.60        |
| Kazald1     | 9.239113                      | 8.49776                | 0.60        |
| Nog         | 9.225143                      | 8.476961               | 0.60        |
| Igsf10      | 11.56717                      | 10.78823               | 0.58        |
| Comp        | 9.126153                      | 8.345913               | 0.58        |
| Egfl6       | 11.31441                      | 10.52462               | 0.58        |
| C1qtnf7     | 7.203754                      | 6.413078               | 0.58        |
| Itih5       | 7.934453                      | 7.136135               | 0.58        |
| Ism1        | 10.0227                       | 9.196692               | 0.56        |
| Ostn        | 8.073424                      | 7.223412               | 0.55        |
| Mfap5       | 11.6336                       | 10.77945               | 0.55        |
| Igf2        | 10.50575                      | 9.61452                | 0.54        |
| Eln         | 8.465084                      | 7.563308               | 0.54        |
| Cdsn        | 11.28851                      | 10.38523               | 0.53        |
| Dkk2        | 10.89053                      | 9.987156               | 0.53        |
| Lama2       | 9.887217                      | 8.980033               | 0.53        |
| Hapln1      | 10.20322                      | 9.295397               | 0.53        |
| Clec11a     | 11.20922                      | 10.30105               | 0.53        |
| Adamtsl4    | 9.446327                      | 8.510282               | 0.52        |
| Igfbp3      | 10.70945                      | 9.765949               | 0.52        |
| Npnt        | 10.83807                      | 9.884694               | 0.52        |
| Spock3      | 9.324848                      | 8.341289               | 0.51        |
| Rspo3       | 12.32692                      | 11.30021               | 0.49        |
| Gdf6        | 9.822467                      | 8.764868               | 0.48        |
| Cpxm2       | 8.859323                      | 7.785863               | 0.48        |
| Pi15        | 7.955539                      | 6.860623               | 0.47        |
| Fbn2        | 10.29051                      | 9.18915                | 0.47        |
| Sod3        | 11.21276                      | 10.1035                | 0.46        |
| Ltbp2       | 12.15063                      | 11.02642               | 0.46        |
| Epha3       | 10.19808                      | 9.068214               | 0.46        |
| Sfrp1       | 11.59235                      | 10.4572                | 0.46        |
| Gdf10       | 11.17581                      | 10.02972               | 0.45        |
| Col8a2      | 9.027334                      | 7.843607               | 0.44        |
| Col14a1     | 10.30187                      | 9.062504               | 0.42        |
| C1qtnf3     | 10.64427                      | 9.351943               | 0.41        |
| Smoc1       | 10.44718                      | 9.012997               | 0.37        |
| Frem1       | 9.579592                      | 7.988935               | 0.33        |
| Prss35      | 10.08394                      | 8.136783               | 0.26        |
| Chrdl1      | 9.84583                       | 7.649113               | 0.22        |

**Rankl and OPG in microarray**

| Gene symbol | Expression level (log2 scale) |                        | Fold change |
|-------------|-------------------------------|------------------------|-------------|
|             | Ctrl                          | <i>Men1</i> -deficient |             |
| Tnfsf11     | 7.937284                      | 8.162434               | 1.17        |
| Tnfrsf11b   | 10.60535                      | 11.01384               | 1.33        |
