# Supplementary figures and images for: Loss of menin in osteoblast lineage affects osteocyte–osteoclast crosstalk causing osteoporosis
Source: Springer Nature journal article supplement (doi:10.1038/cdd.2016.165), 2017-01-20

Figure S1

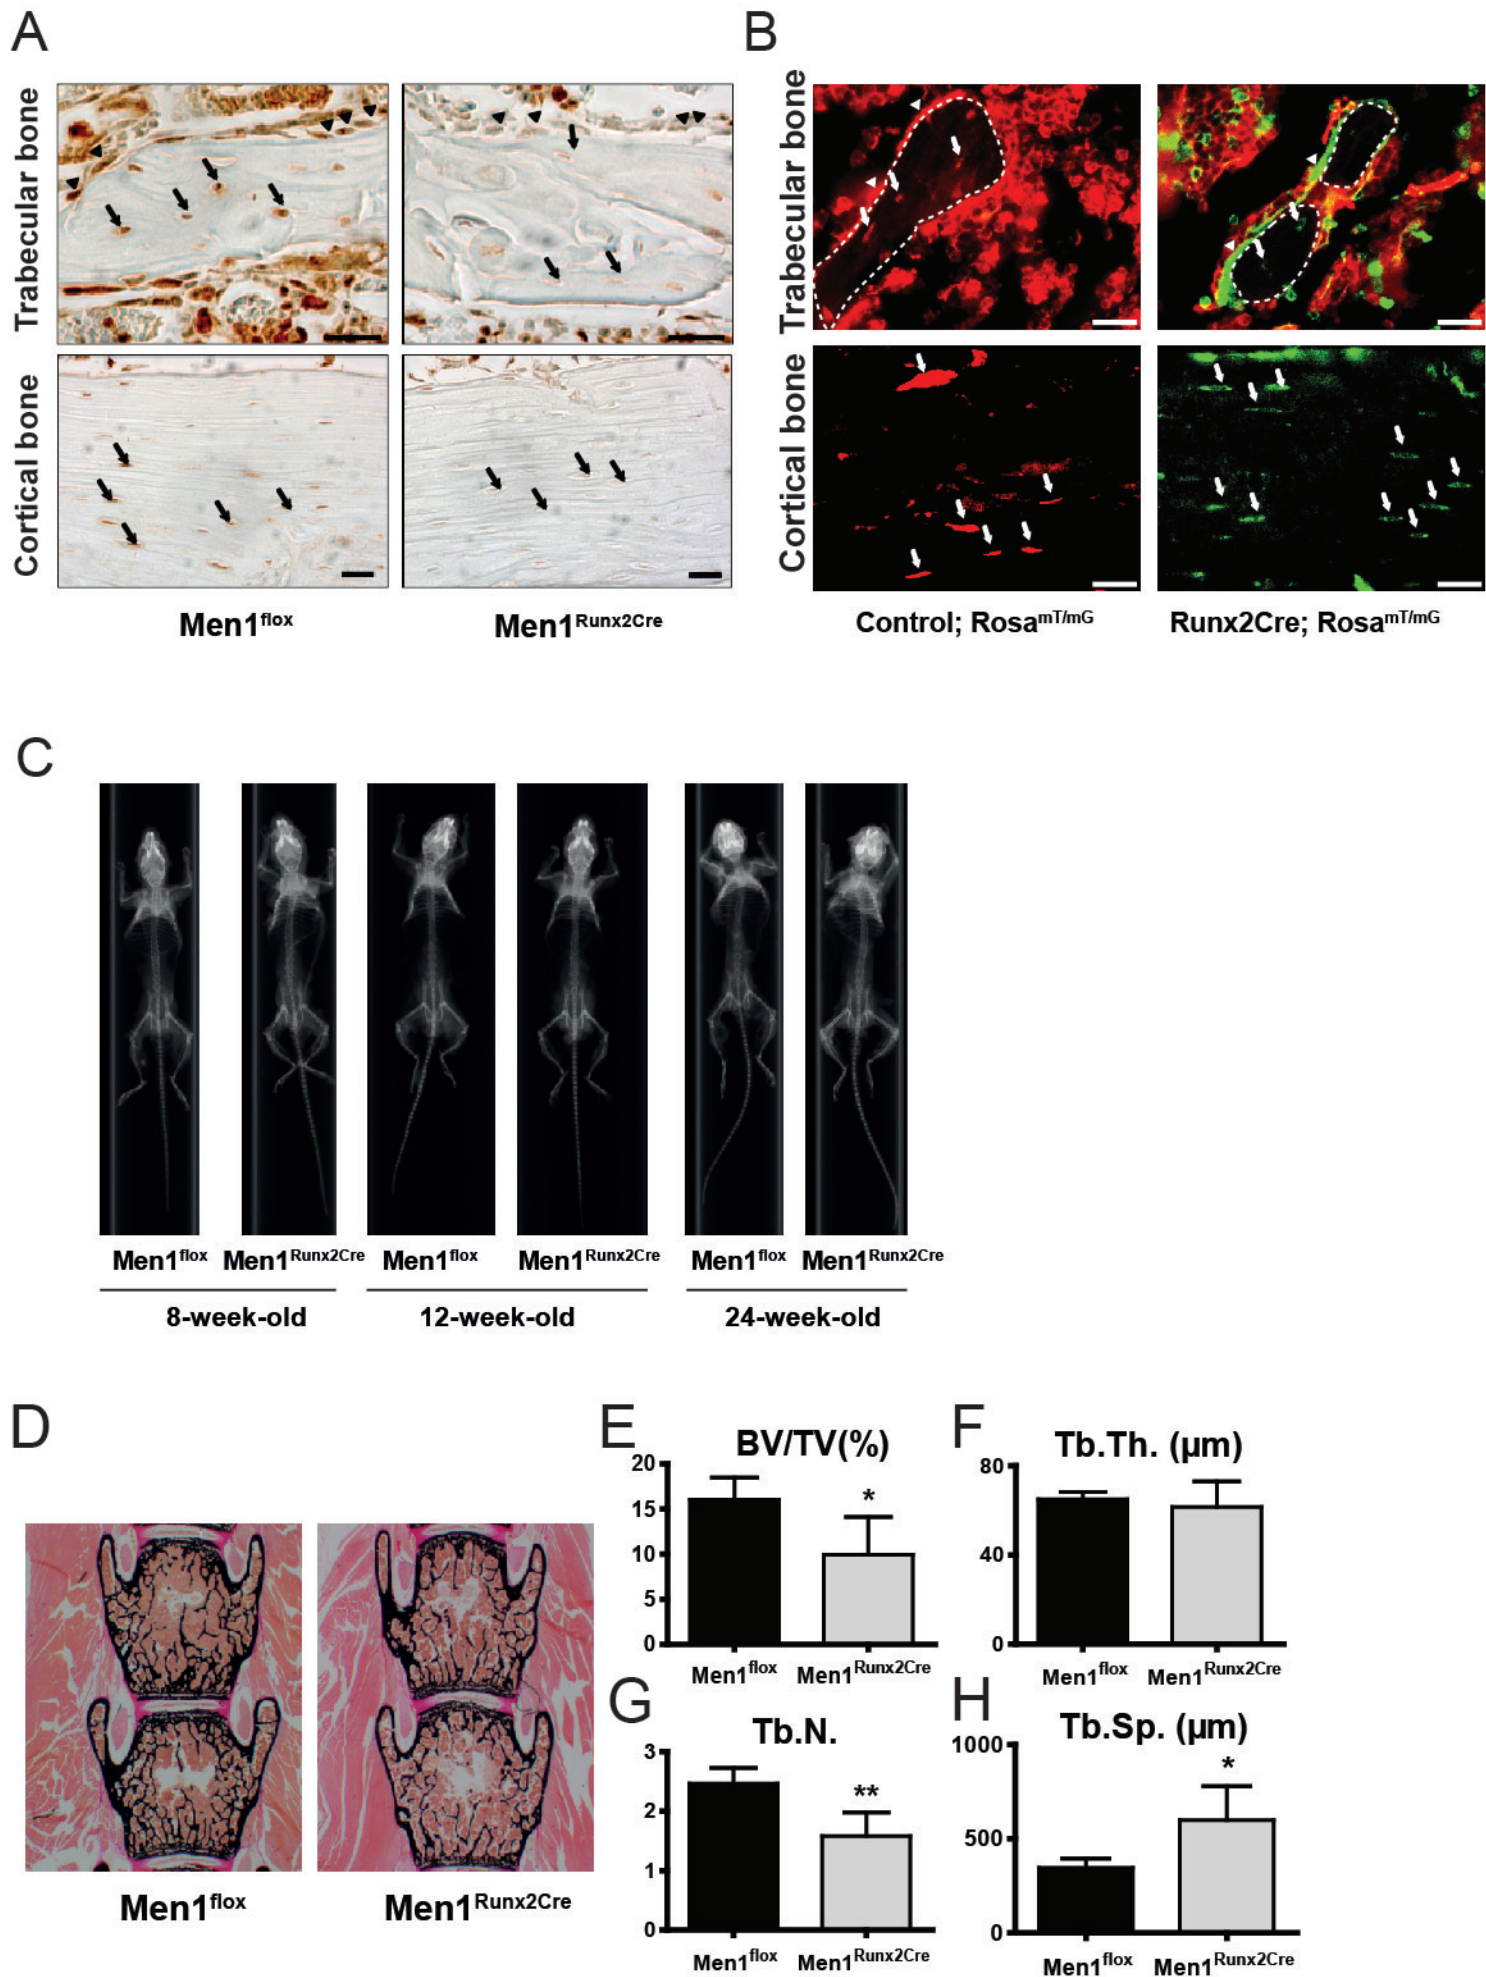

Figure S2

A

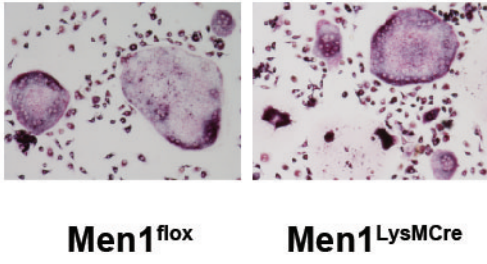

B

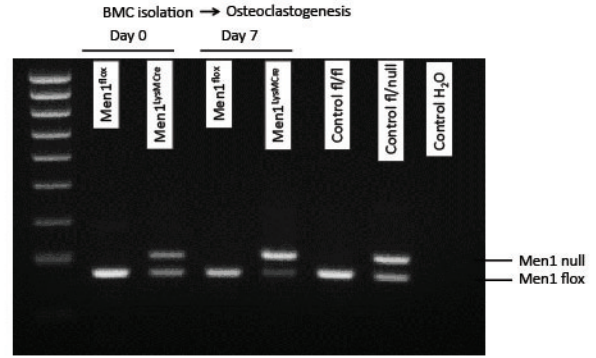

C

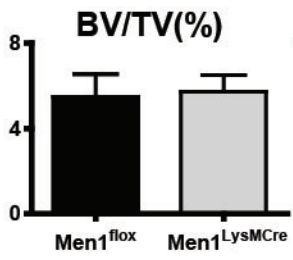

D

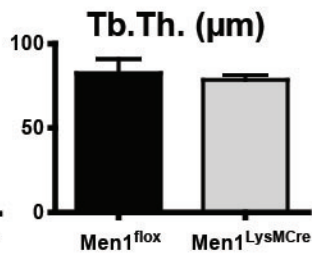

E

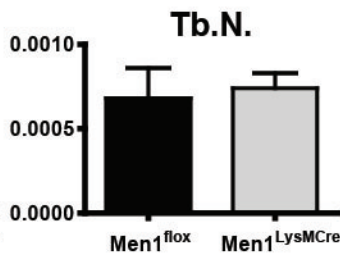

F

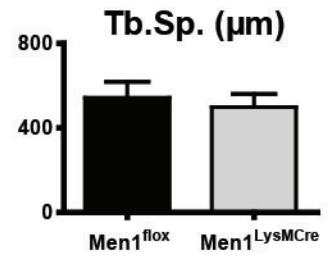

Figure S3

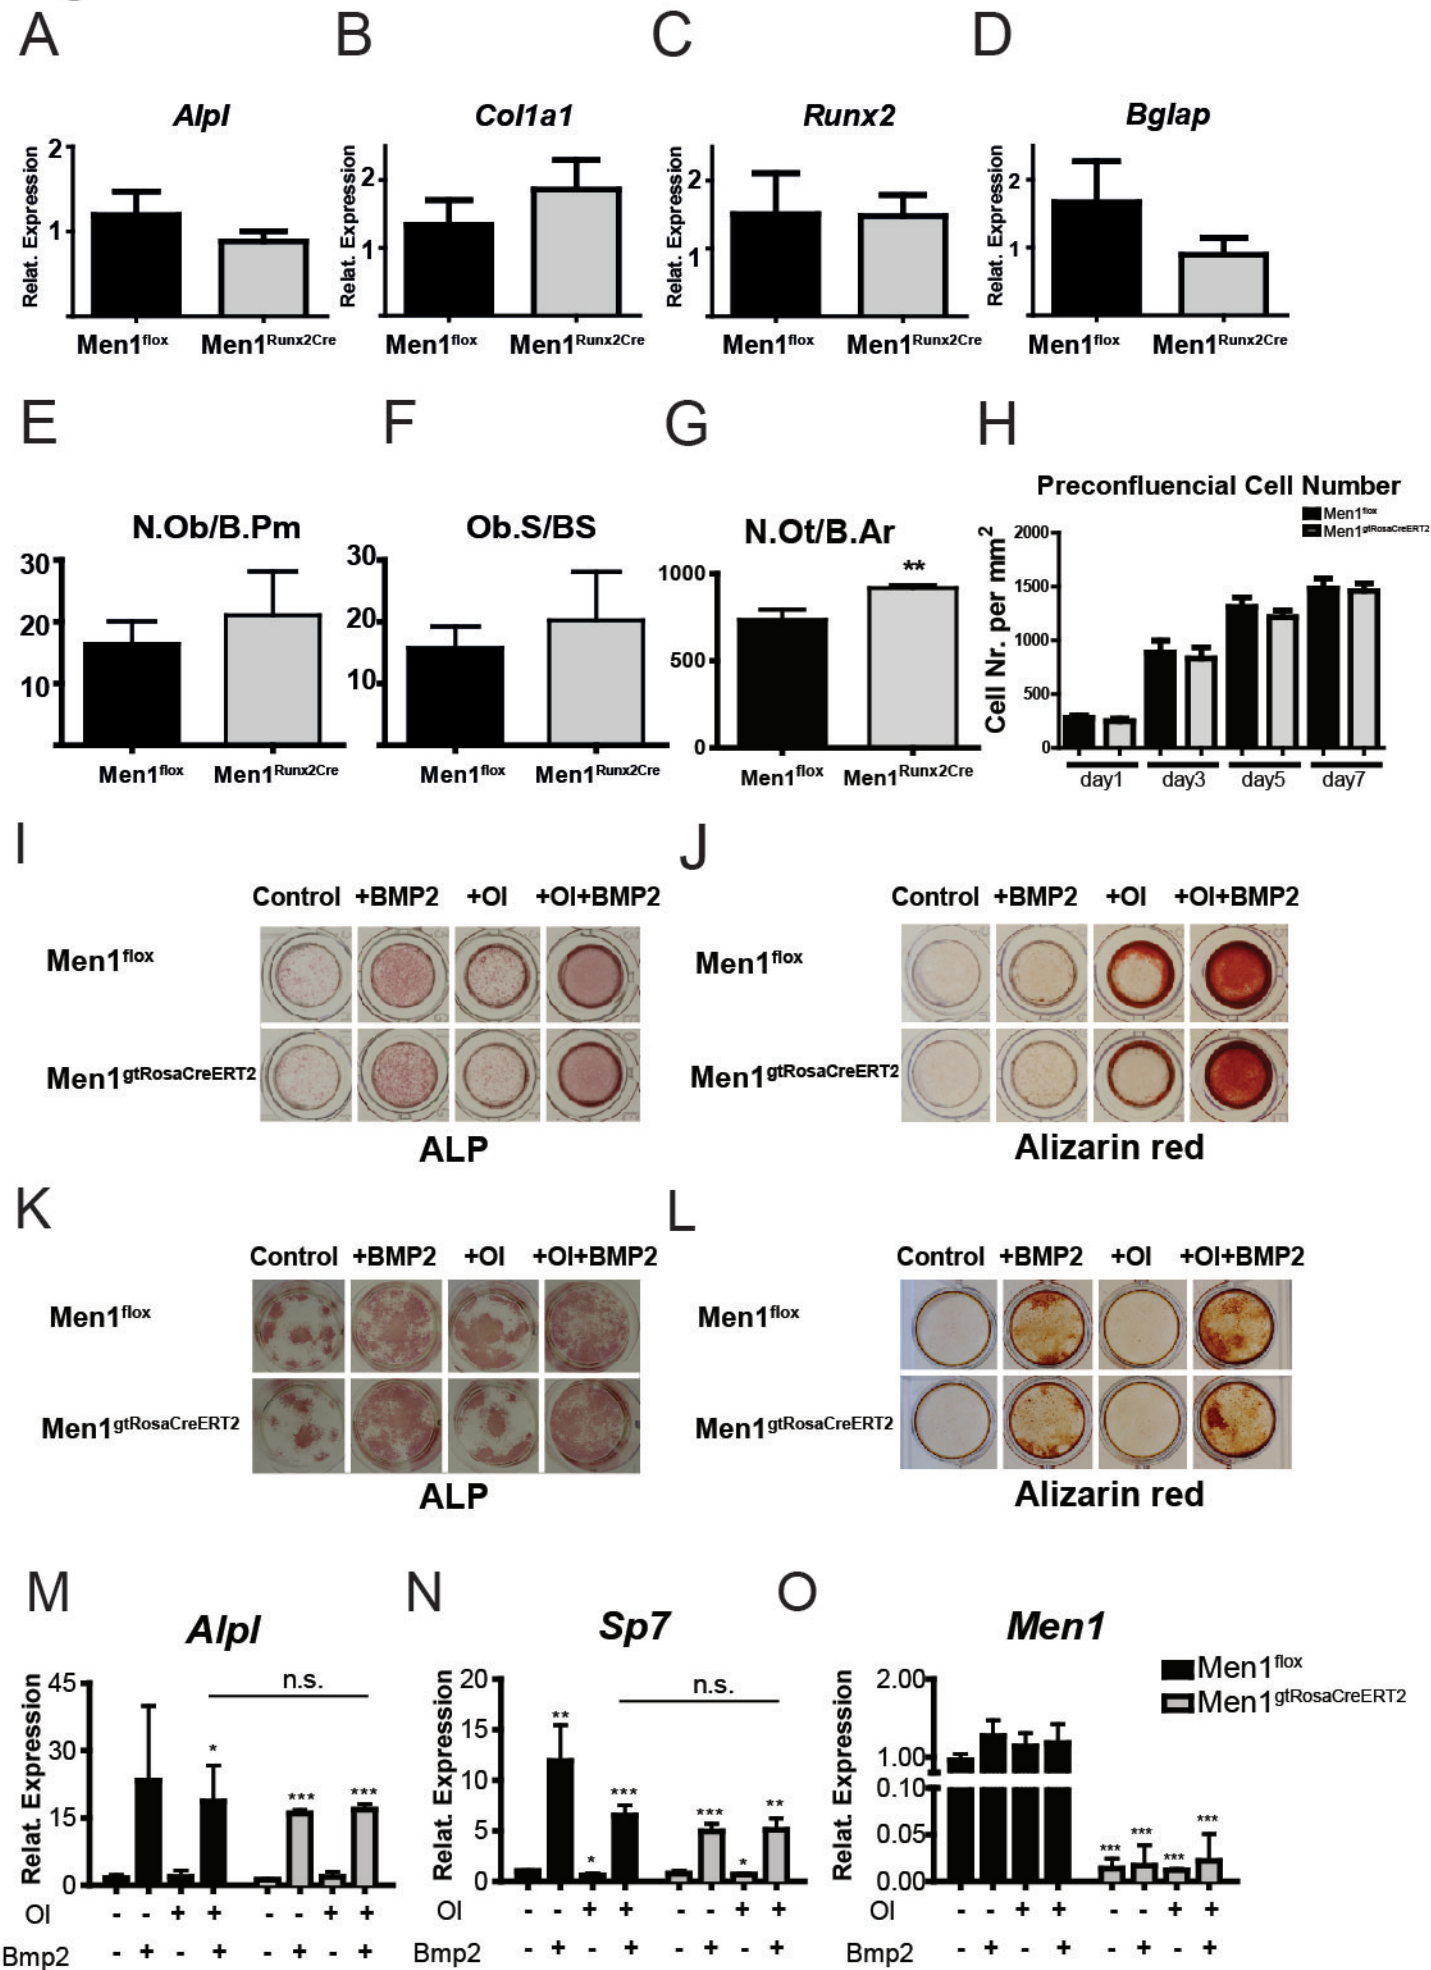

# Figure S3

P

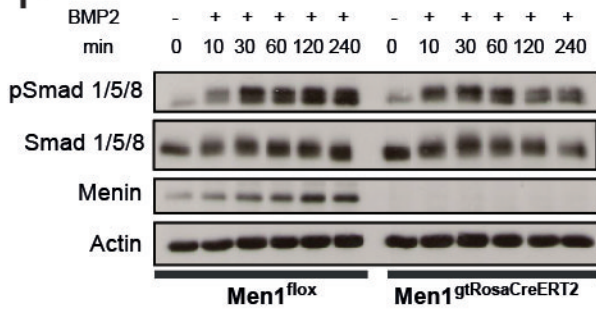

S

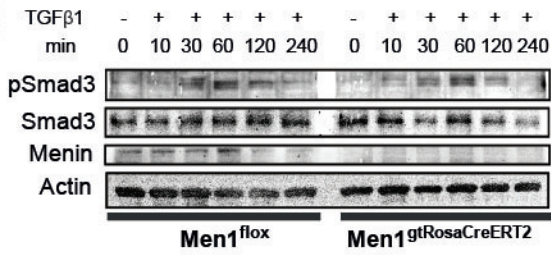

V

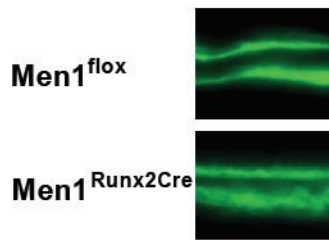

X

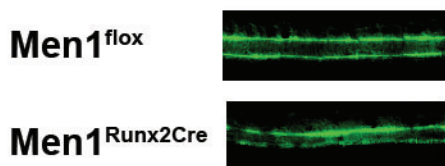

Q

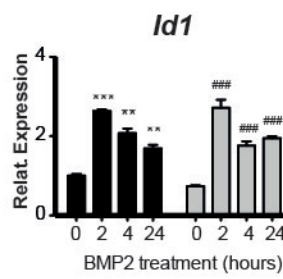

R

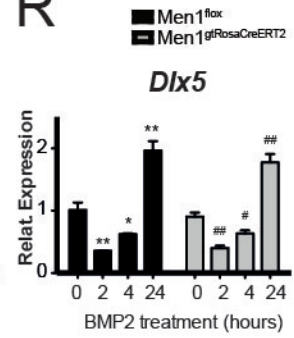

T

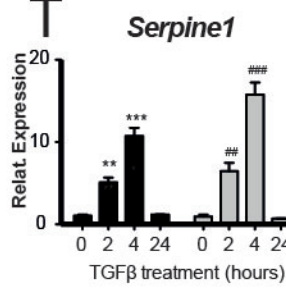

U

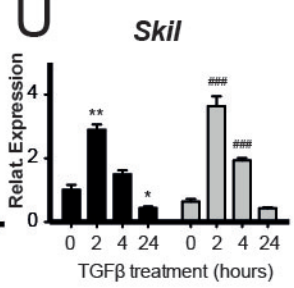

W

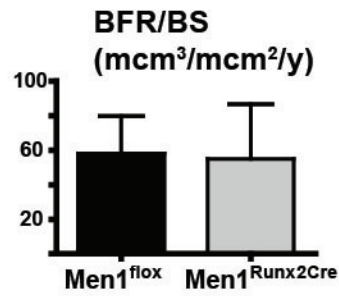

Y

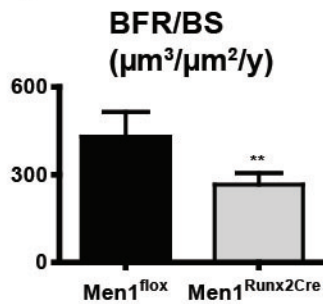

# Figure S4

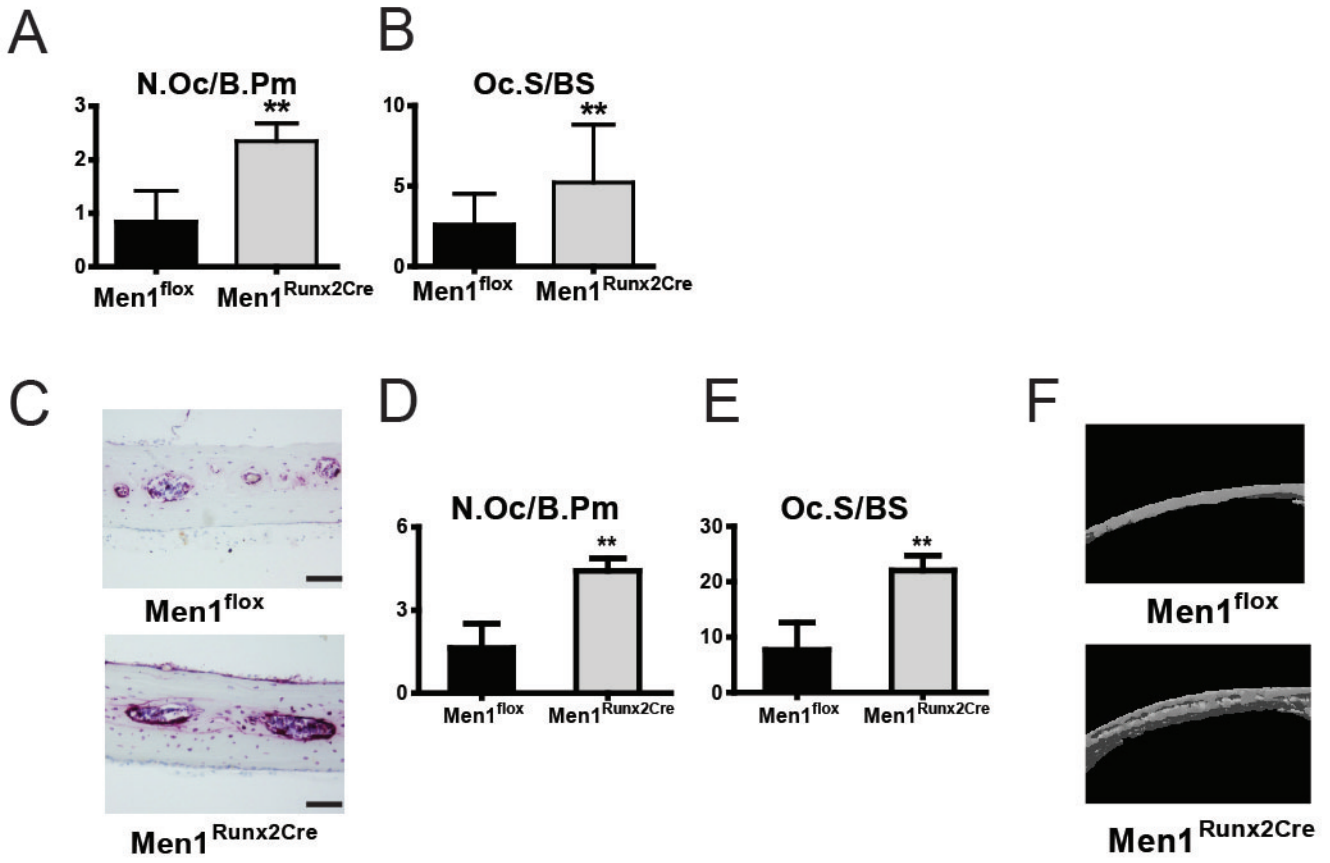

# Figure S5

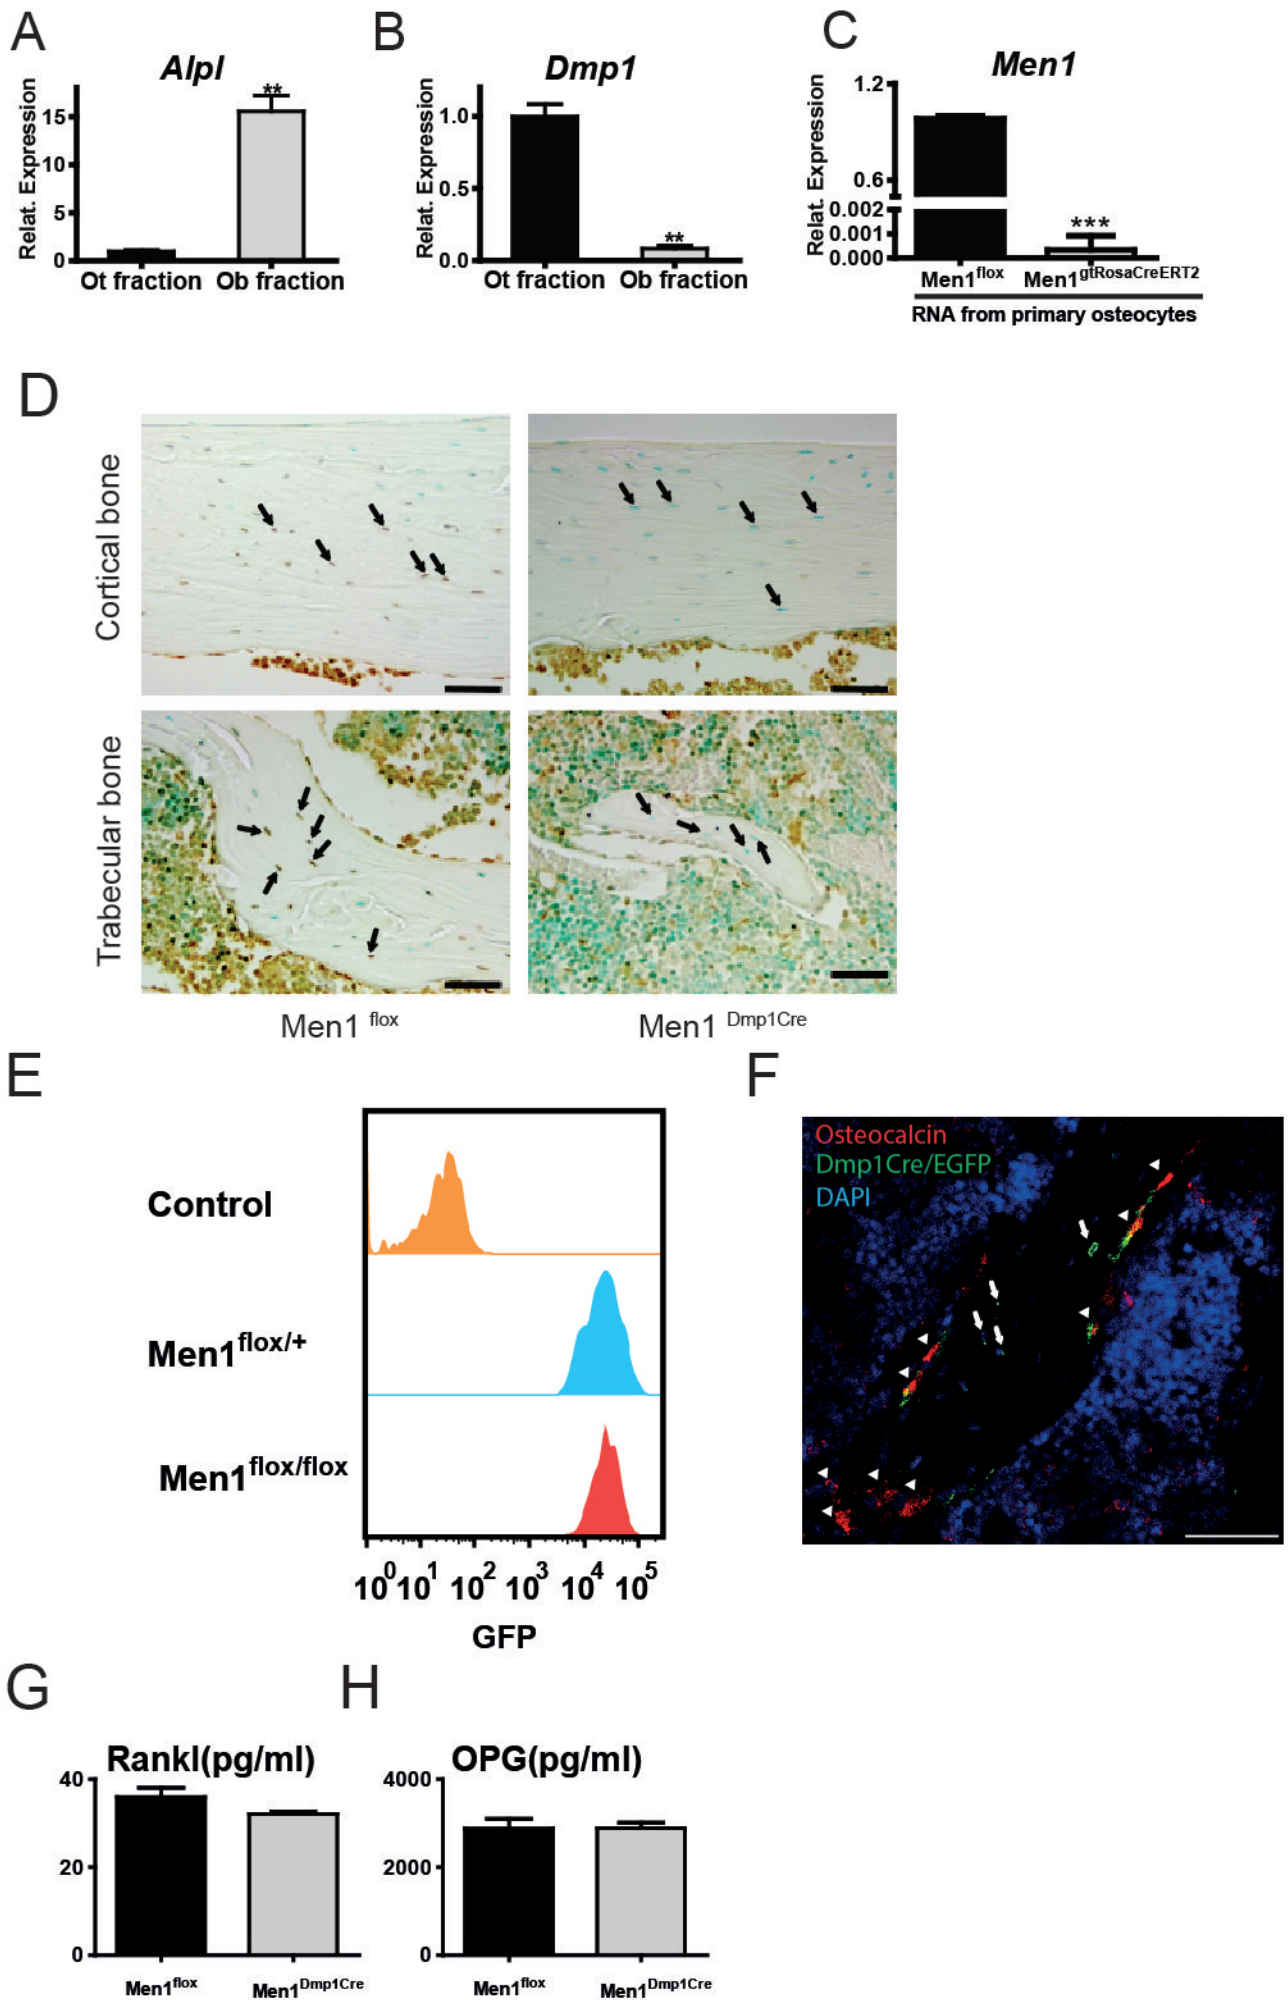

Figure S6

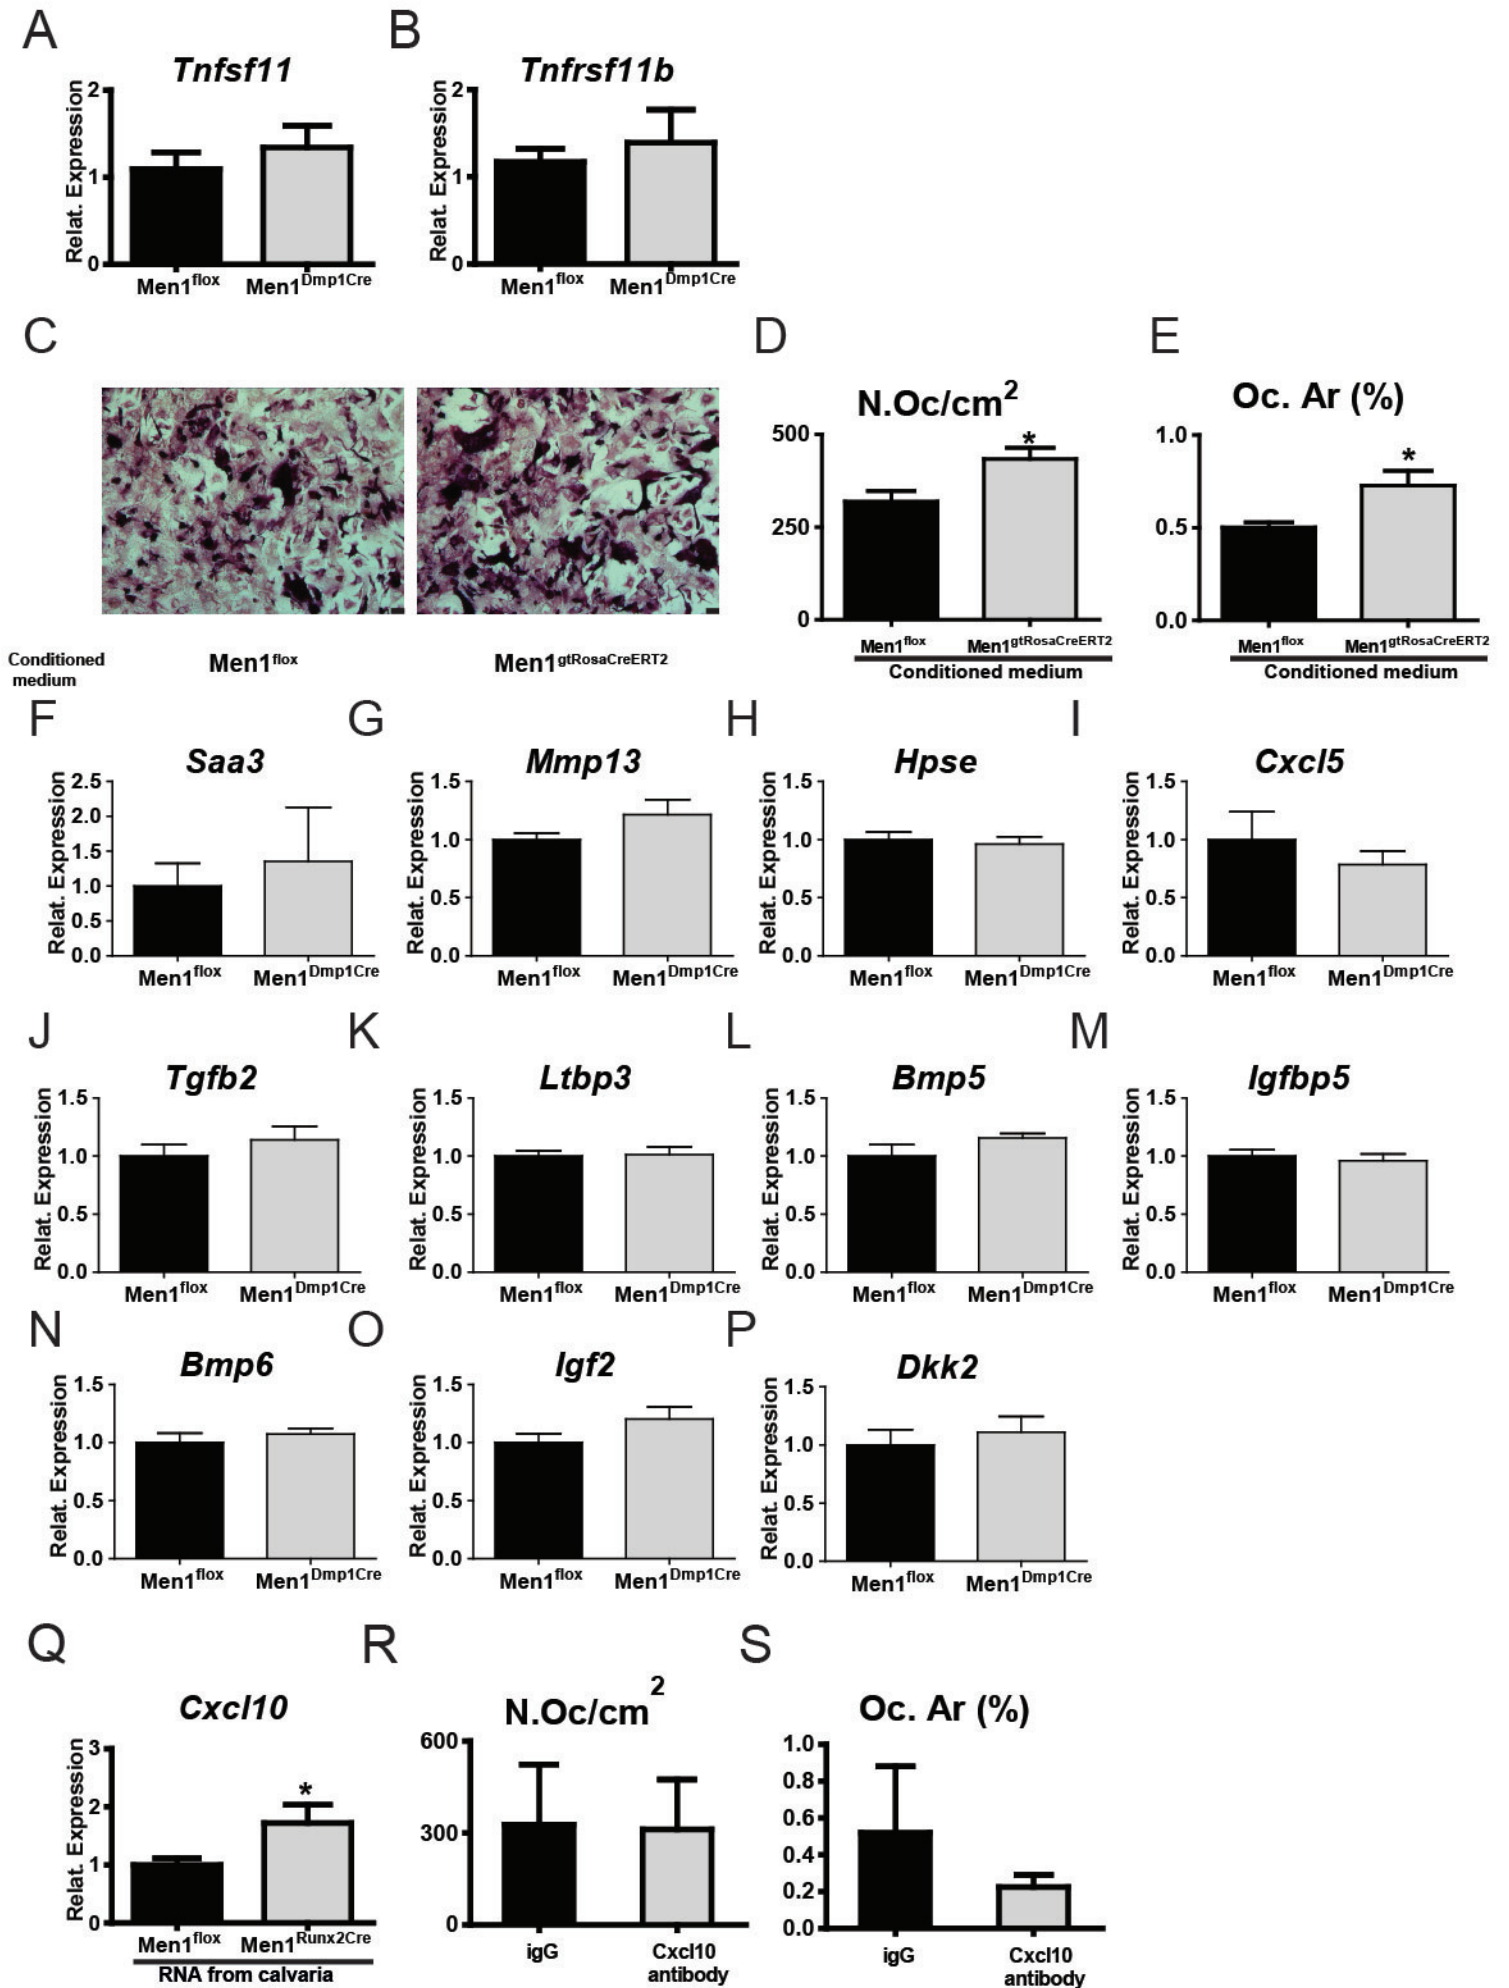

Supplement: 41418_2017_BFcdd2016165_MOESM29_ESM.pdf [file 41418_2017_BFcdd2016165_MOESM29_ESM.pdf]
